# Supplementary material for: Zone-MPC Automated Insulin Delivery Algorithm Tuned for Pregnancy Complicated by Type 1 Diabetes
Source: PubMed Central journal article supplement (PMC8982146; doi:10.3389/fendo.2021.768639), 2022-03-22
Supplement: Presentation_1.pdf [file Presentation_1.pdf]

## Supplementary Material

# 1 Summary plots

In this section, we provide average glucose trajectories and insulin inputs for baseline and pregnancy-specific zone-MPC and under each scenario.

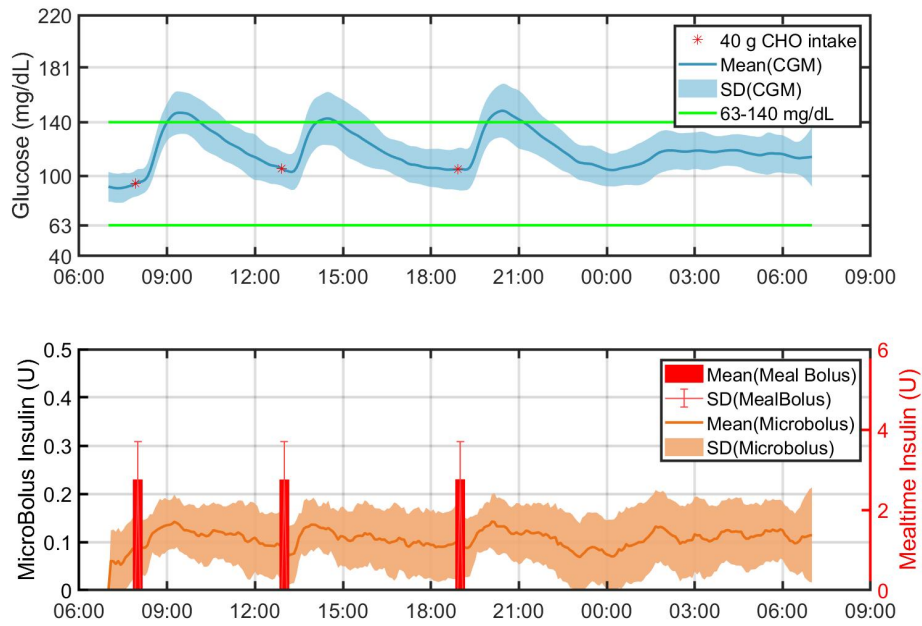

(a) Baseline Controller Design: Treatment parameters are tuned for pregnancy and meal boluses are administered at mealtimes

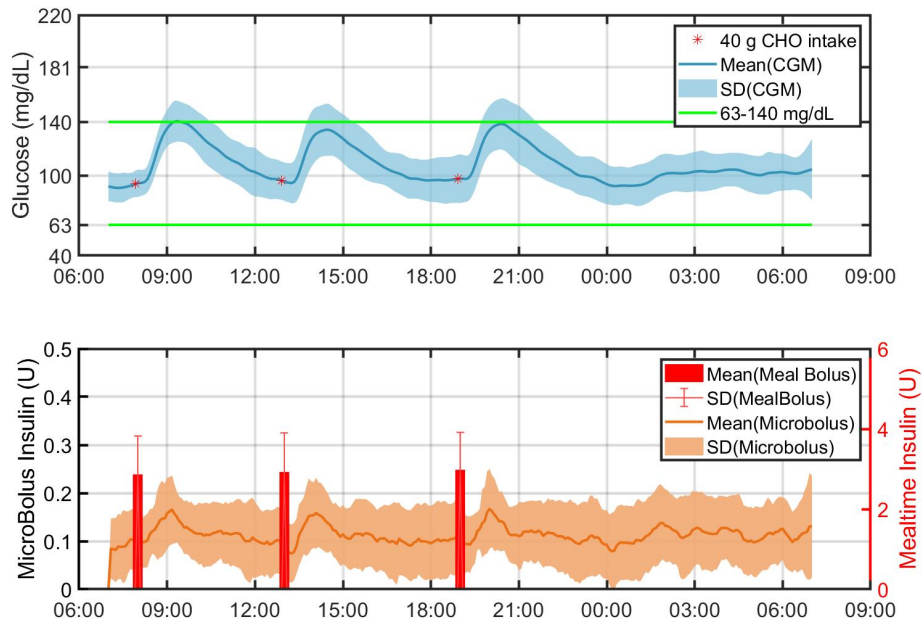

(b) Pregnancy-specific Controller Design: Treatment parameters are tuned for pregnancy and meal boluses are administered at mealtimes

Figure 1: Summary plots of insulin injection and glucose outcomes under Scenario A.1

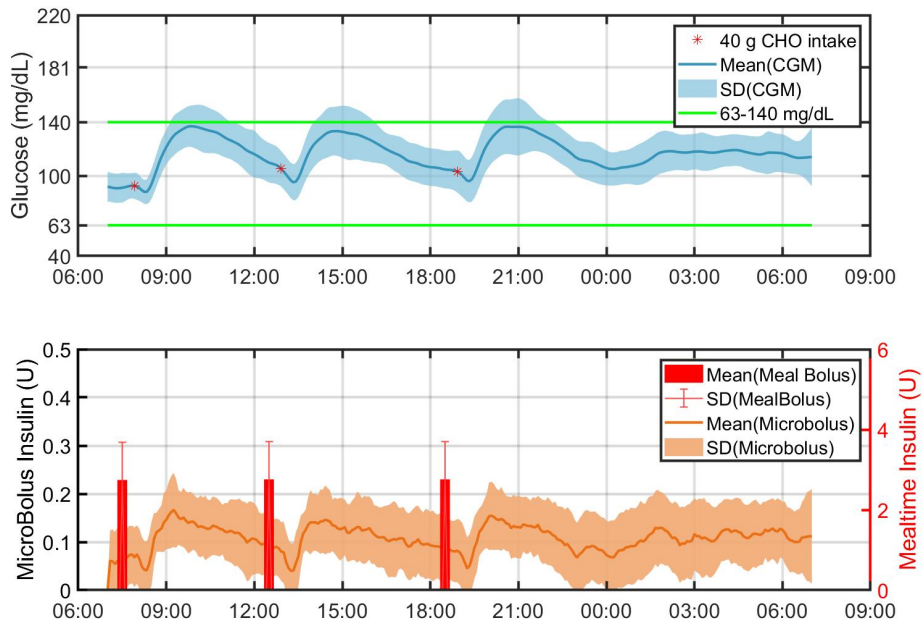

(a) Baseline Controller Design: Treatment parameters are tuned for pregnancy and meal boluses are administered 30 minutes before mealtime

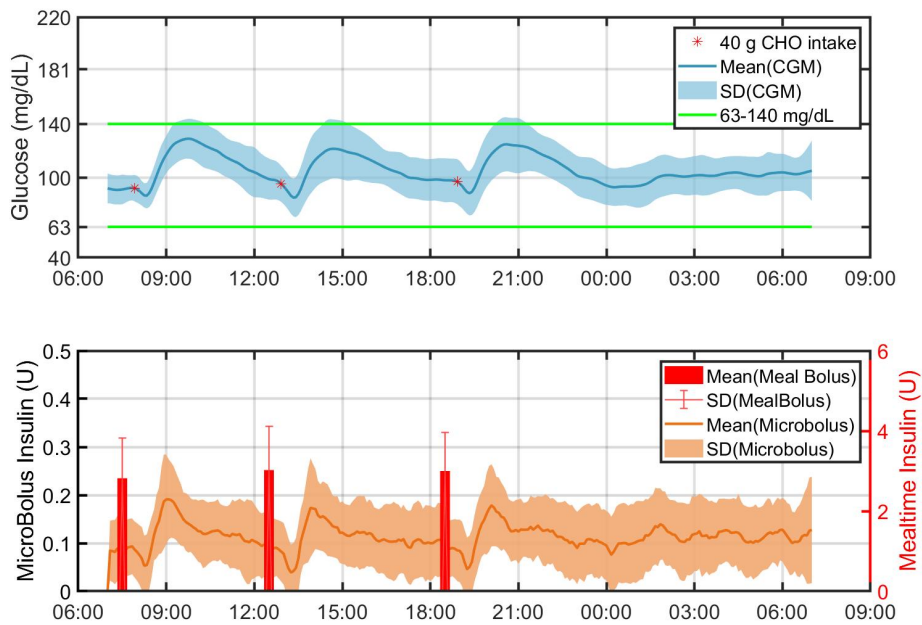

(b) Pregnancy-specific Controller Design: Treatment parameters are tuned for pregnancy and meal boluses are administered 30 minutes before mealtime

Figure 2: Summary plots of insulin injection and glucose outcomes under Scenario A.2

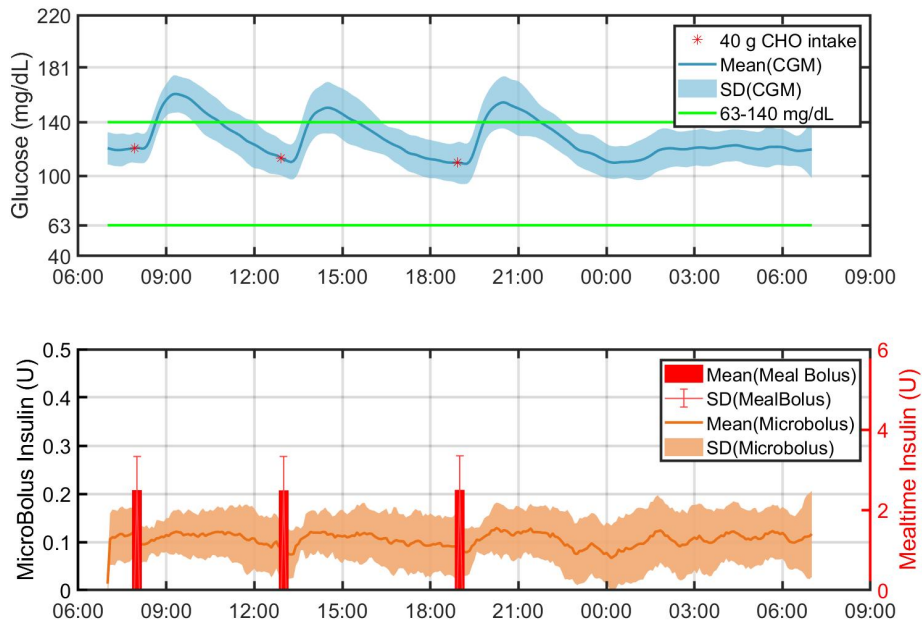

(a) Baseline Controller Design: Treatment parameters are not tuned for pregnancy and meal boluses are administered at mealtimes

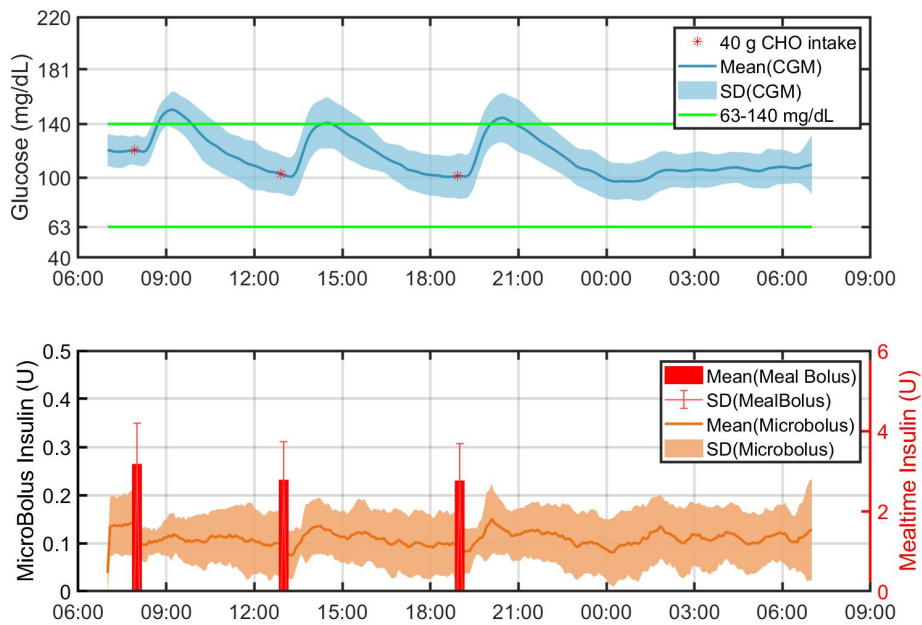

(b) Pregnancy-specific Controller Design: Treatment parameters are not tuned for pregnancy and meal boluses are administered at mealtimes

Figure 3: Summary plots of insulin injection and glucose outcomes under Scenario B.1a

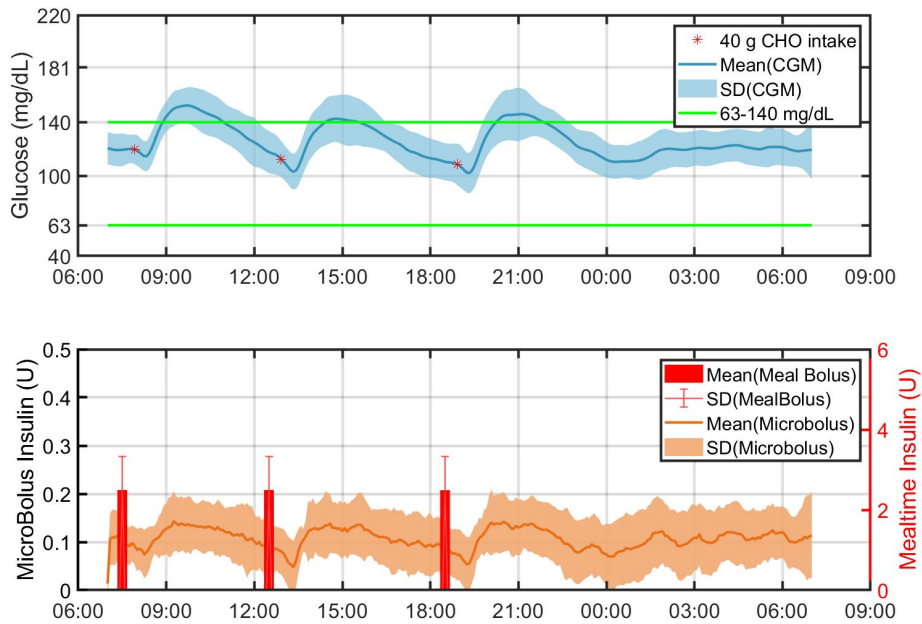

(a) Baseline Controller Design: Treatment parameters are not tuned for pregnancy and meal boluses are administered 30 minutes before mealtime

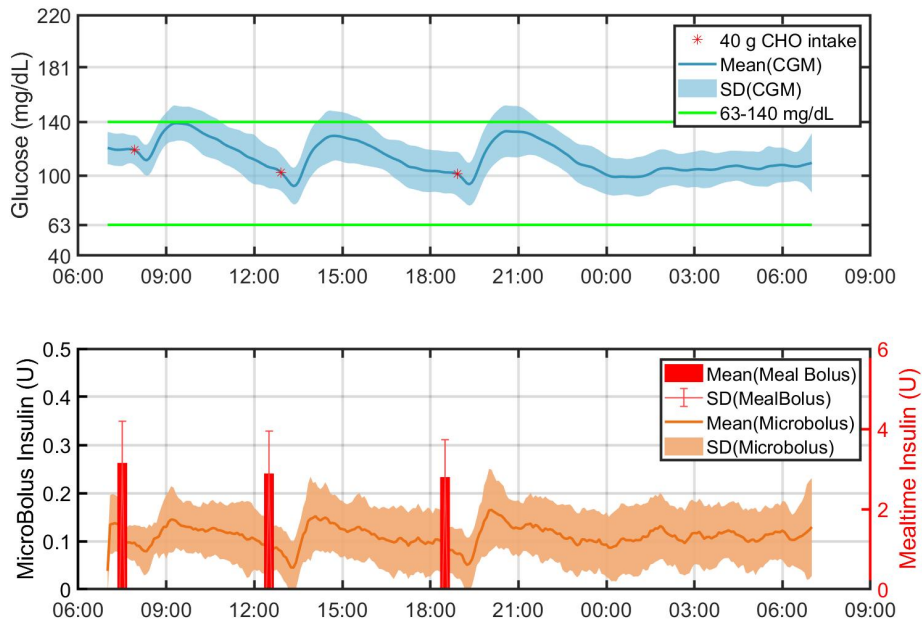

(b) Pregnancy-specific Controller Design: Treatment parameters are not tuned for pregnancy and meal boluses are administered 30 minutes before mealtime

Figure 4: Summary plots of insulin injection and glucose outcomes under Scenario B.1b

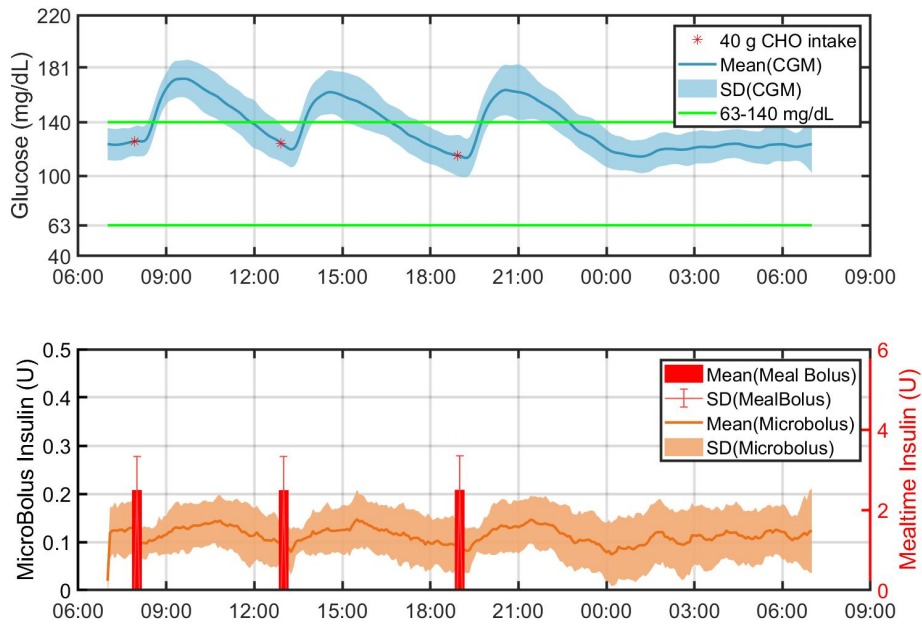

(a) Baseline Controller Design: Treatment parameters not tuned for pregnancy, subjects are 25% more insulin resistant, and meal boluses are administered at mealtimes

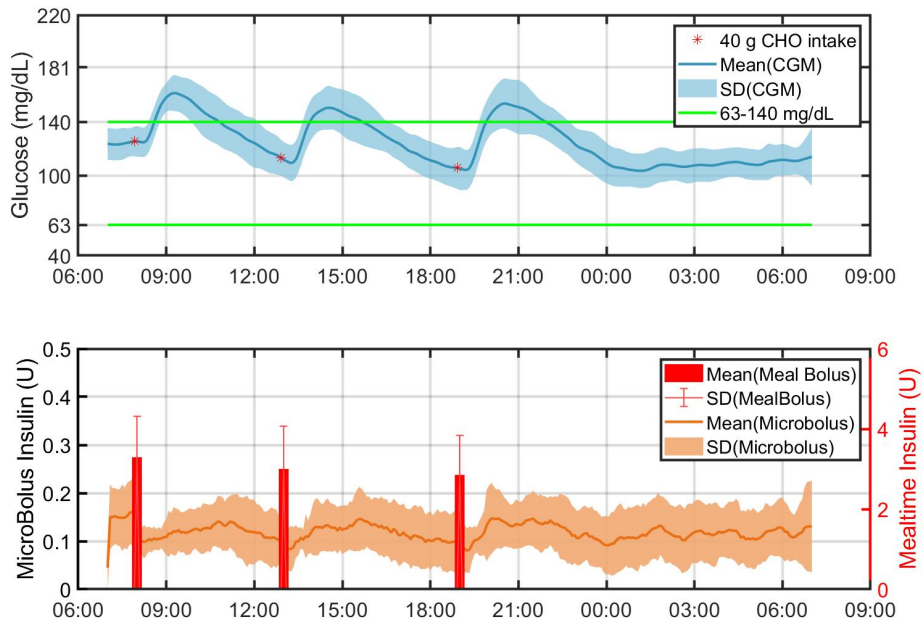

(b) Pregnancy-specific Controller Design: Treatment parameters not tuned for pregnancy, subjects are 25% more insulin resistant, and meal boluses are administered at mealtimes

Figure 5: Summary plots of insulin injection and glucose outcomes under Scenario B.2a



(a) Baseline Controller Design: Treatment parameters are tuned for pregnancy, subjects are 25% more insulin resistant, and meal boluses are given 30 minutes before mealtime

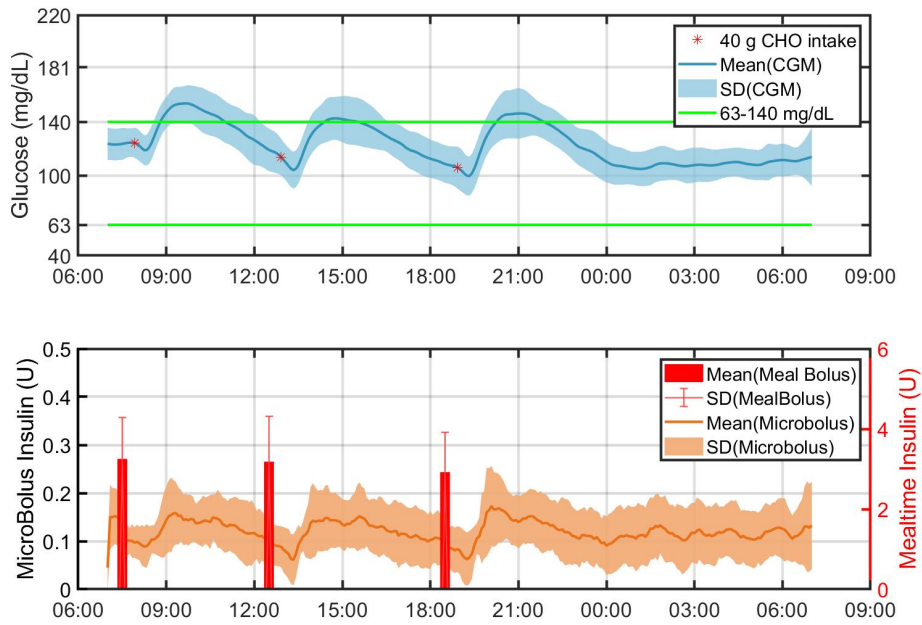

(b) Pregnancy-specific Controller Design: Treatment parameters are not tuned for pregnancy, subjects are 25% more insulin resistant, and meal boluses are given 30 minutes before mealtime

Figure 6: Summary plots of insulin injection and glucose outcomes under Scenario B.2b



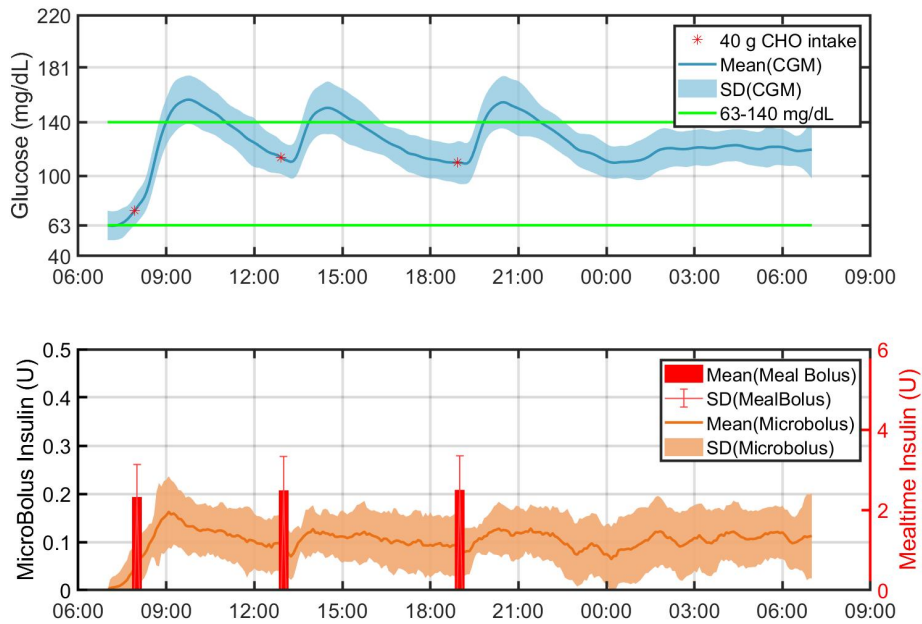

(a) Baseline Controller Design: Treatment parameters are not tuned for pregnancy, initial glucose is 60 mg/dL, and meal boluses are administered at mealtimes

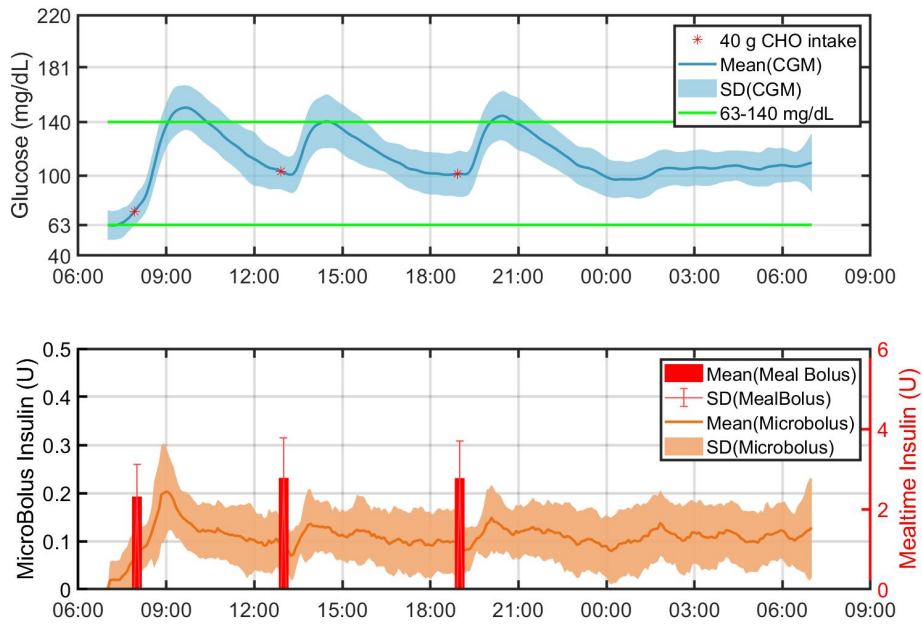

(b) Pregnancy-specific Controller Design: Treatment parameters are not tuned for pregnancy, initial glucose is 60 mg/dL, and meal boluses are administered at mealtimes

Figure 7: Summary plots of insulin injection and glucose outcomes under Scenario B.3a

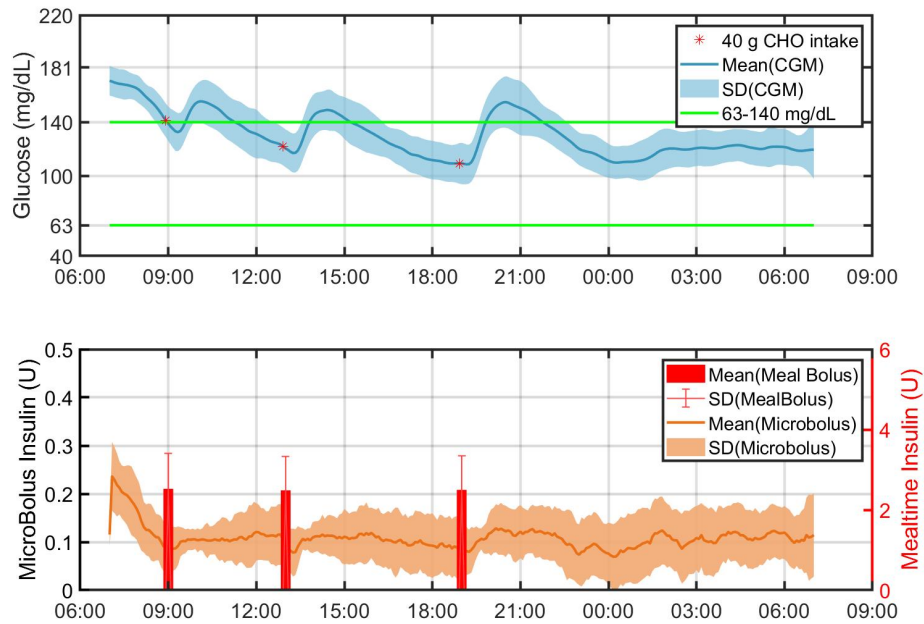

(a) Baseline Controller Design: Treatment parameters are not tuned for pregnancy, initial glucose is 170 mg/dL, and meal boluses are administered at mealtimes

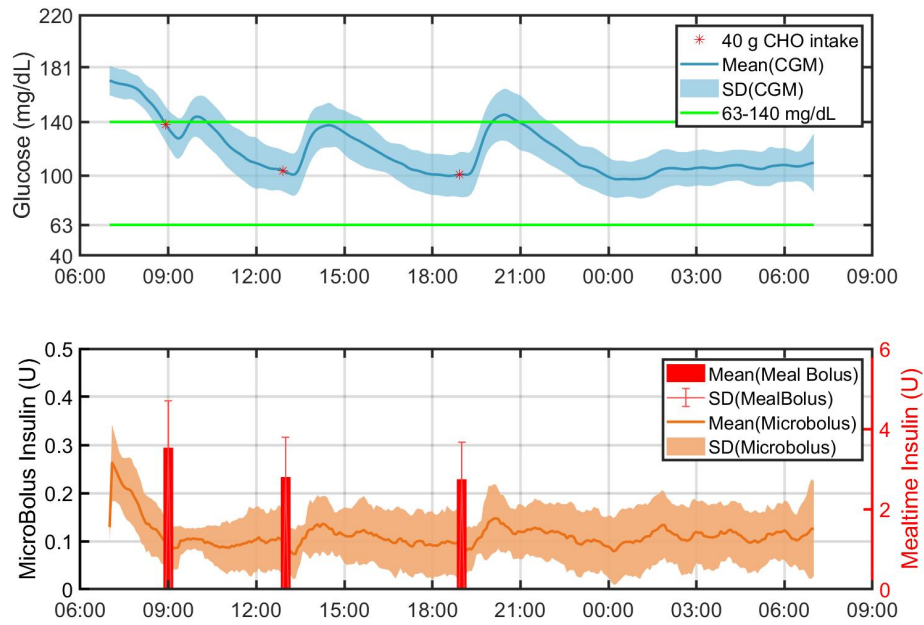

(b) Pregnancy-specific Controller Design: Treatment parameters are not tuned for pregnancy, initial glucose is 170 mg/dL, and meal boluses are administered at mealtimes

Figure 8: Summary plots of insulin injection and glucose outcomes under Scenario B.3b

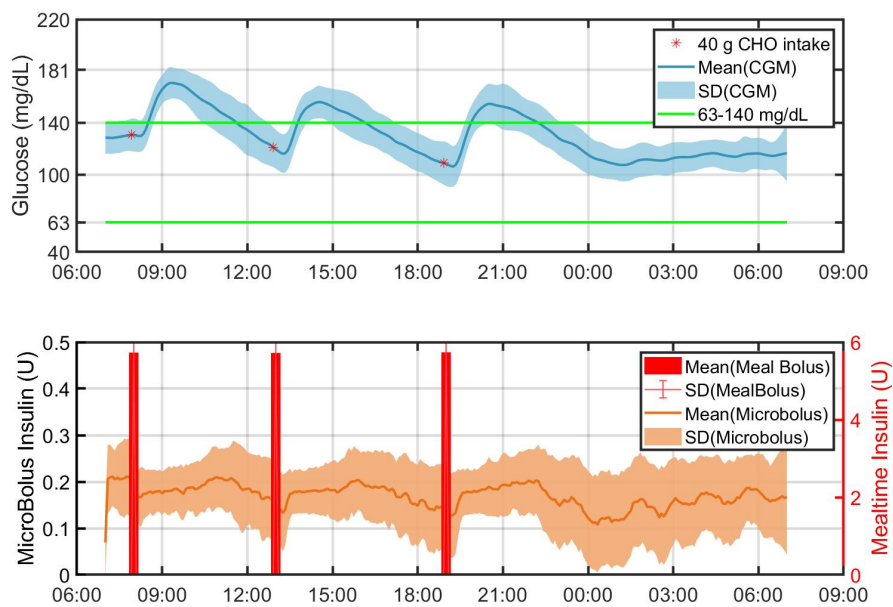

(a) Baseline Controller Design: High Insulin Resistance with Treatment Regimen Adjusted for Pregnancy. Meal boluses are administered at mealtimes

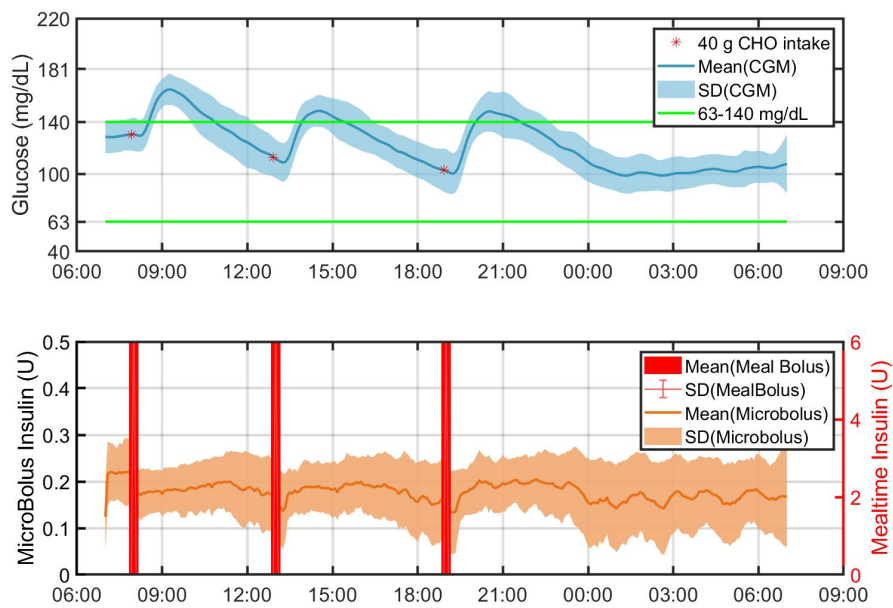

(b) Pregnancy-specific Controller Design: High Insulin Resistance with Treatment Regimen Adjusted for Pregnancy. Meal boluses are administered at mealtimes

Figure 9: Summary plots of insulin injection and glucose outcomes under Scenario C.1

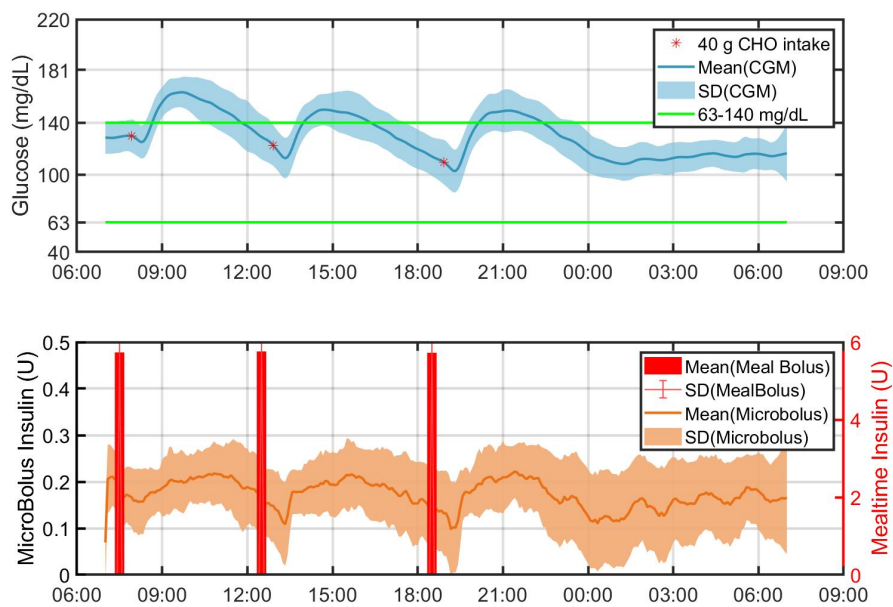

(a) Baseline Controller Design: High Insulin Resistance with Treatment Regimen Adjusted for Pregnancy. Meal boluses are administered 30 minutes before mealtimes

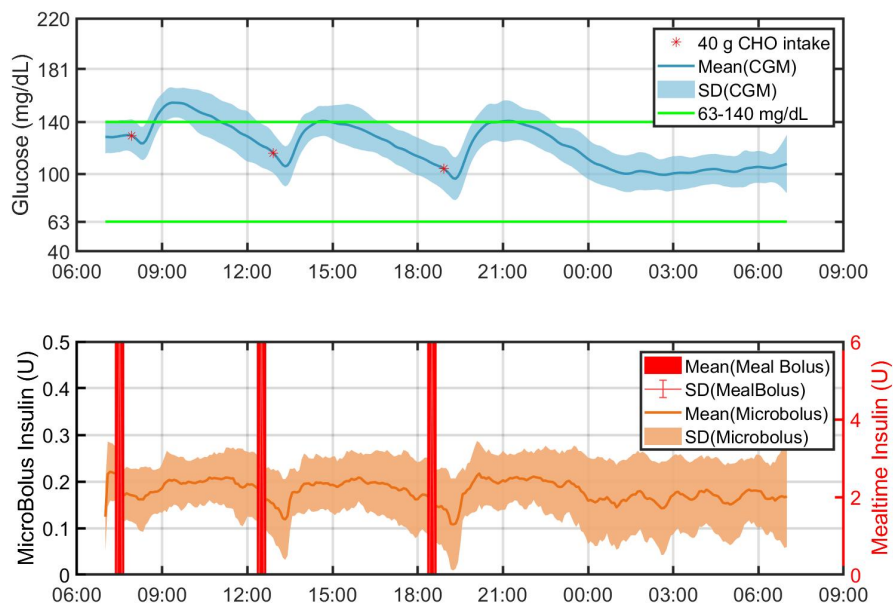

(b) Pregnancy-specific Controller Design: High Insulin Resistance with Treatment Regimen Adjusted for Pregnancy. Meal boluses are administered 30 minutes before mealtimes

Figure 10: Summary plots of insulin injection and glucose outcomes under Scenario C.2

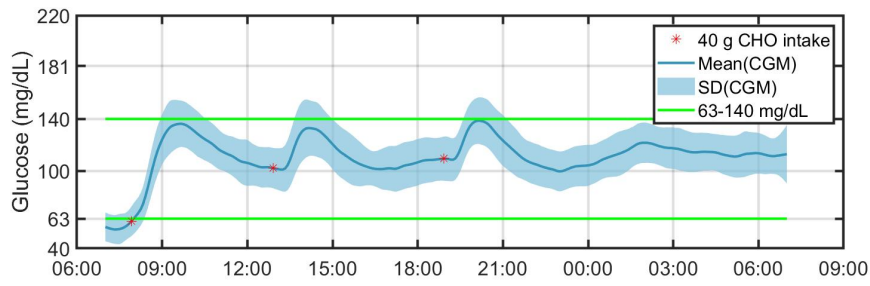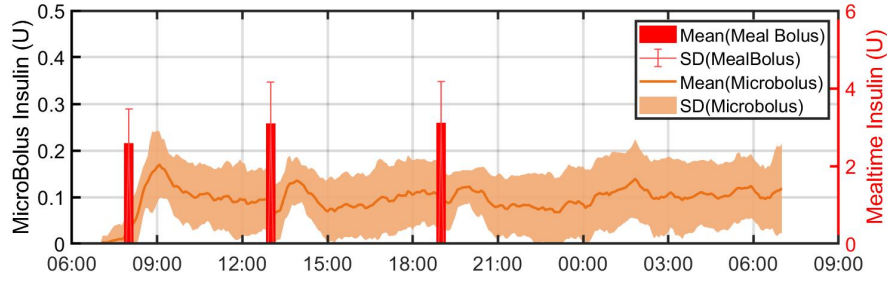

(a) Baseline Controller Design: Hypoglycemia prone extreme-case scenario

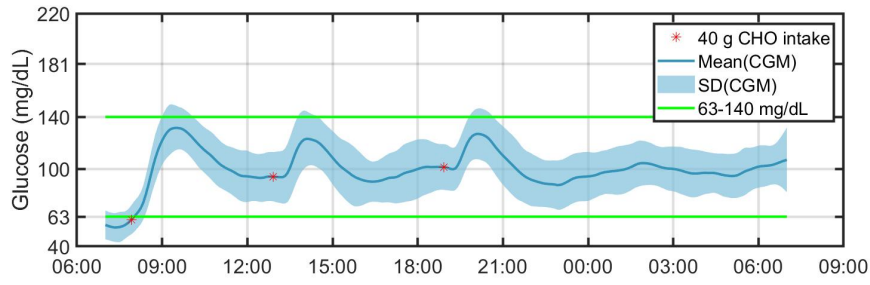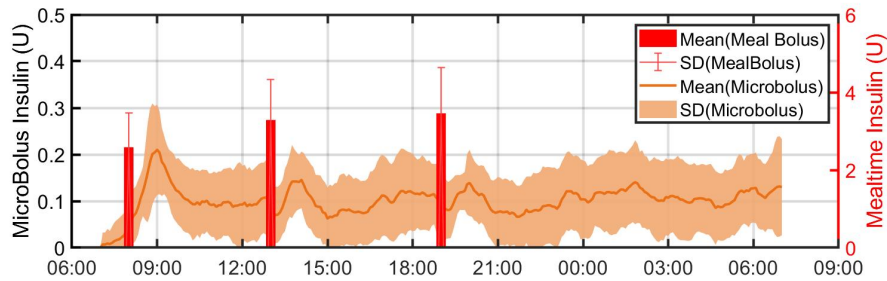

(b) Pregnancy-specific Controller Design: Hypoglycemia prone extreme-case scenario

Figure 11: Summary plots of insulin injection and glucose outcomes under Scenario D.1

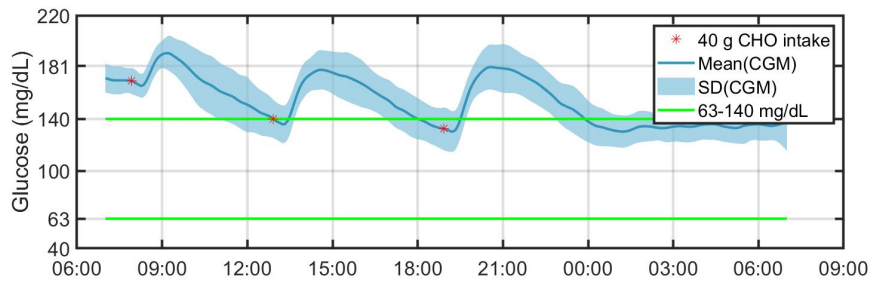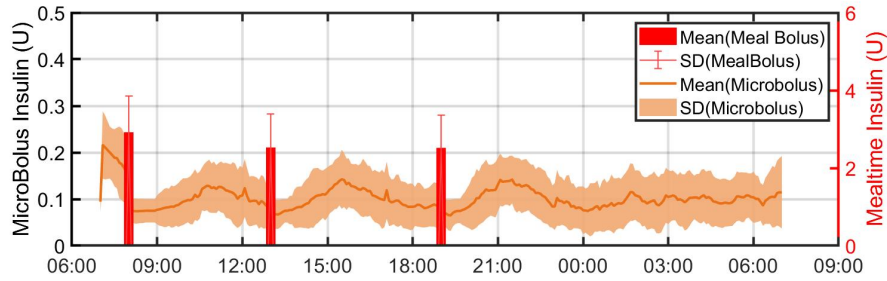

(a) Baseline Controller Design: Hyperglycemia prone extreme-case scenario

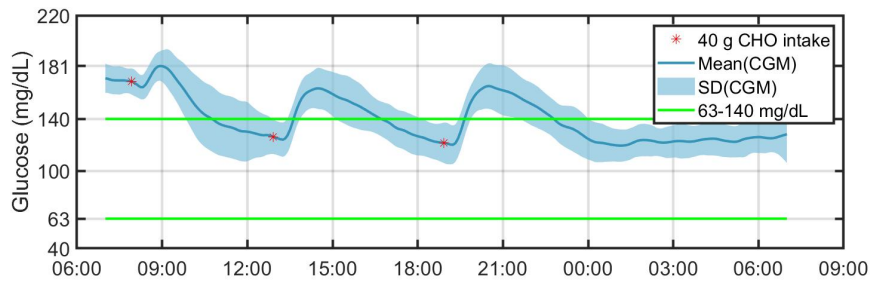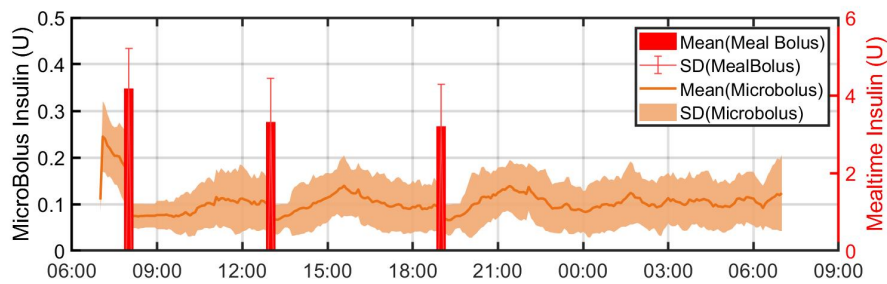

(b) Pregnancy-specific Controller Design: Hyperglycemia prone extreme-case scenario

Figure 12: Summary plots of insulin injection and glucose outcomes under Scenario D.2

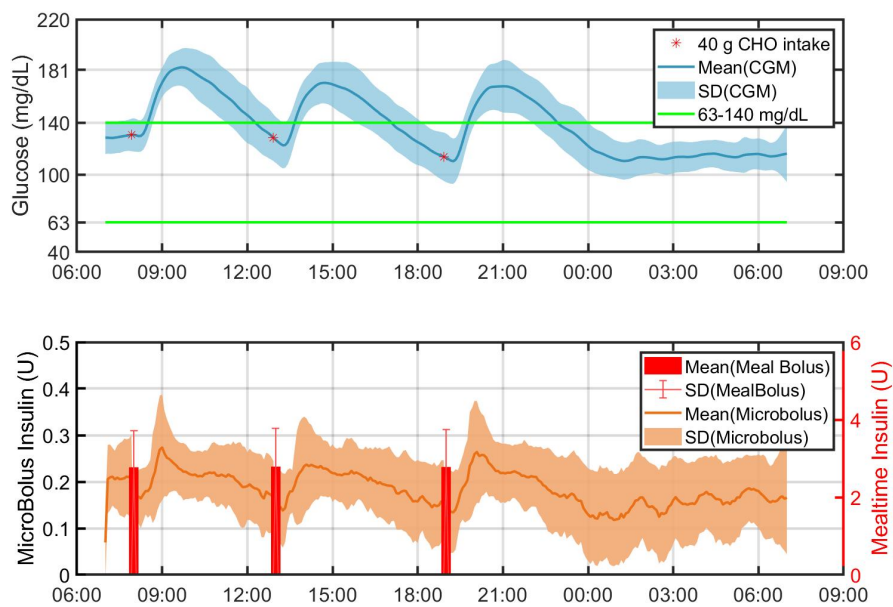

(a) Baseline Controller Design: High insulin resistance with poorly adjusted CR, extreme-case scenario

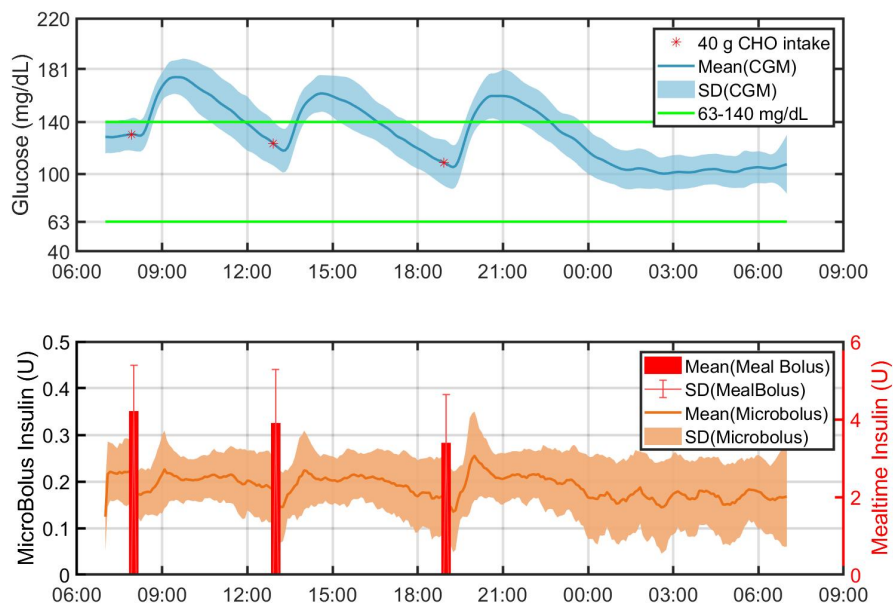

(b) Pregnancy-specific Controller Design: High insulin resistance with poorly adjusted CR, extreme-case scenario

Figure 13: Summary plots of insulin injection and glucose outcomes under Scenario D.3

## 2 IOB Curves

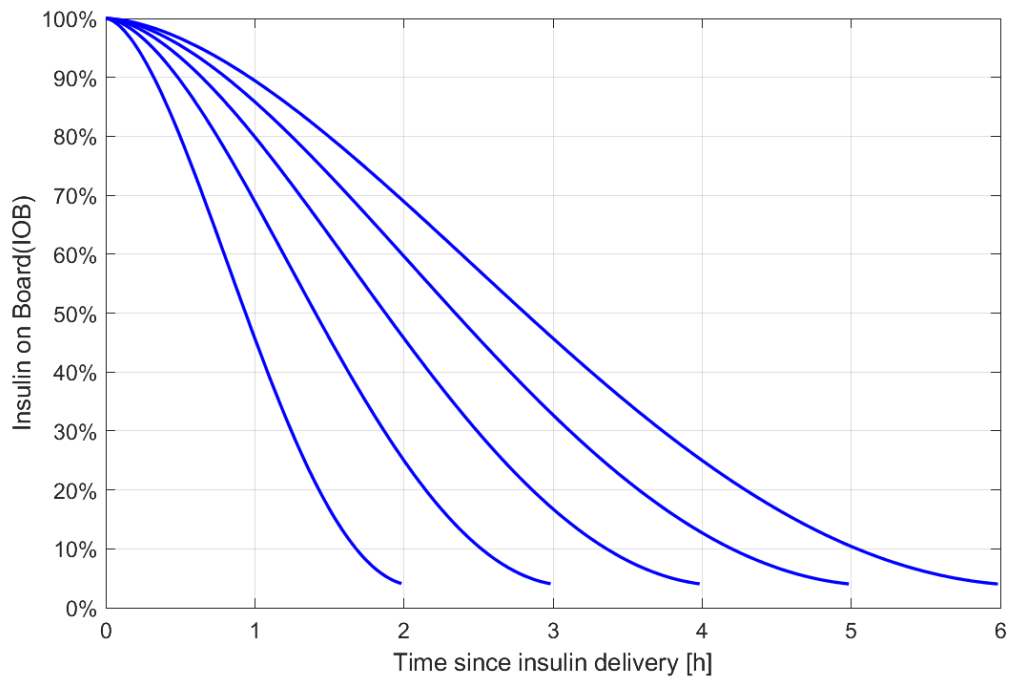

Figure 14: Exemplary IOB decay curves of length 2 hours to 6 hours



### 3 P-values from paired t-tests

Here we provide p-values obtained for the differences between the zone-adjusted vs. pregnancy-specific controller performances presented in Table 3 and 4.

Table 1: P-values for zone-adjusted vs. pregnancy controller performance evaluated for pregnancy glycemic targets

| Scenario | % Time < 54 mg/dL | % Time < 63 mg/dL | % Time 63-140 mg/dL | % Time > 140 mg/dL |
|----------|-------------------|-------------------|---------------------|--------------------|
| A.1      | 0.140             | 0.019             | 0.135               | 0.039              |
| A.2      | 0.161             | 0.056             | 0.119               | 0.074              |
| B.1.a    | 0.274             | 0.069             | 0.000               | 0.000              |
| B.1.b    | 0.343             | 0.051             | 0.000               | 0.000              |
| B.2.a    | NaN               | 0.343             | 0.000               | 0.000              |
| B.2.b    | 0.343             | 0.620             | 0.000               | 0.000              |
| B.3.a    | 0.186             | 0.045             | 0.000               | 0.000              |
| B.3.b    | 0.197             | 0.058             | 0.001               | 0.000              |
| C.1      | 0.343             | 0.232             | 0.001               | 0.001              |
| C.2      | 0.343             | 0.419             | 0.000               | 0.000              |
| D.1      | 0.016             | 0.005             | 0.019               | 0.133              |
| D.2      | NaN               | 0.343             | 0.000               | 0.000              |
| D.3      | 0.343             | 0.343             | 0.000               | 0.000              |

Table 2: P-values for zone-adjusted vs. pregnancy controller performance evaluated for standard glycemic targets

| Scenario | % Time < 70 mg/dL | % Time 70-180 mg/dL | % Time > 180 mg/dL | % Time > 250 mg/dL |
|----------|-------------------|---------------------|--------------------|--------------------|
| A.1      | 0.018             | 0.114               | 0.342              | NaN                |
| A.2      | 0.010             | 0.015               | 0.320              | NaN                |
| B.1.a    | 0.042             | 0.939               | 0.206              | NaN                |
| B.1.b    | 0.048             | 0.843               | 0.252              | NaN                |
| B.2.a    | 0.237             | 0.046               | 0.043              | NaN                |
| B.2.b    | 0.180             | 0.066               | 0.062              | NaN                |
| B.3.a    | 0.030             | 0.961               | 0.261              | NaN                |
| B.3.b    | 0.029             | 0.292               | 0.118              | NaN                |
| C.1      | 0.897             | 0.000               | 0.016              | NaN                |
| C.2      | 0.275             | 0.040               | 0.025              | NaN                |
| D.1      | 0.001             | 0.001               | 0.343              | NaN                |
| D.2      | 0.343             | 0.001               | 0.001              | 0.343              |
| D.3      | 0.509             | 0.011               | 0.011              | NaN                |

## 4 Post-hoc Evaluation of Parameter Choices

Next four pages show results of additional exemplary analyses that explore local sensitivity of metrics around  $\psi_p$  under Scenarios A.2 and B.1.a for selected pairs of elements in  $\psi$ .

**Analysis I: IOB decay curve length ( $\lambda$ ) and threshold for an additional correction bolus along with the meal bolus threshold ( $\tau_c$ )**

| Scenario A.2                |        |        |        |        |        | Scenario B.1.a              |        |        |        |        |        |
|-----------------------------|--------|--------|--------|--------|--------|-----------------------------|--------|--------|--------|--------|--------|
| <b>63-140 mg/dL</b>         |        |        |        |        |        | <b>63-140 mg/dL</b>         |        |        |        |        |        |
| $\lambda \backslash \tau_c$ | 90     | 100    | 110    | 120    | 130    | $\lambda \backslash \tau_c$ | 90     | 100    | 110    | 120    | 130    |
| 1                           | 96.56% | 96.45% | 96.41% | 96.41% | 96.41% | 1                           | 89.50% | 89.36% | 88.81% | 88.78% | 88.29% |
| 2                           | 96.66% | 96.47% | 96.32% | 96.35% | 96.35% | 2                           | 88.53% | 87.91% | 87.32% | 87.18% | 86.97% |
| 3                           | 96.00% | 95.98% | 95.51% | 95.54% | 95.54% | 3                           | 87.68% | 87.08% | 85.77% | 85.61% | 85.35% |
| 4                           | 94.80% | 94.52% | 94.48% | 94.44% | 94.44% | 4                           | 87.23% | 87.05% | 86.38% | 85.90% | 85.50% |
| 5                           | 95.27% | 94.61% | 94.60% | 94.68% | 94.68% | 5                           | 86.91% | 86.76% | 86.04% | 85.43% | 84.77% |
| 6                           | 94.87% | 94.25% | 93.91% | 93.71% | 93.71% | 6                           | 86.88% | 86.77% | 85.28% | 84.86% | 83.91% |
| <b>&lt; 63 mg/dL</b>        |        |        |        |        |        | <b>&lt; 63 mg/dL</b>        |        |        |        |        |        |
| $\lambda \backslash \tau_c$ | 90     | 100    | 110    | 120    | 130    | $\lambda \backslash \tau_c$ | 90     | 100    | 110    | 120    | 130    |
| 1                           | 0.10%  | 0.10%  | 0.10%  | 0.10%  | 0.10%  | 1                           | 0.00%  | 0.00%  | 0.00%  | 0.00%  | 0.06%  |
| 2                           | 0.11%  | 0.10%  | 0.10%  | 0.10%  | 0.10%  | 2                           | 0.00%  | 0.00%  | 0.00%  | 0.00%  | 0.00%  |
| 3                           | 0.21%  | 0.19%  | 0.19%  | 0.19%  | 0.19%  | 3                           | 0.00%  | 0.00%  | 0.00%  | 0.00%  | 0.00%  |
| 4                           | 0.36%  | 0.51%  | 0.51%  | 0.51%  | 0.51%  | 4                           | 0.00%  | 0.00%  | 0.00%  | 0.00%  | 0.00%  |
| 5                           | 0.36%  | 0.07%  | 0.07%  | 0.07%  | 0.07%  | 5                           | 0.00%  | 0.00%  | 0.00%  | 0.00%  | 0.00%  |
| 6                           | 0.36%  | 0.14%  | 0.14%  | 0.14%  | 0.14%  | 6                           | 0.00%  | 0.00%  | 0.00%  | 0.00%  | 0.00%  |
| <b>&gt; 140 mg/dL</b>       |        |        |        |        |        | <b>&gt; 140 mg/dL</b>       |        |        |        |        |        |
| $\lambda \backslash \tau_c$ | 90     | 100    | 110    | 120    | 130    | $\lambda \backslash \tau_c$ | 90     | 100    | 110    | 120    | 130    |
| 1                           | 3.3%   | 3.4%   | 3.5%   | 3.5%   | 3.5%   | 1                           | 10.50% | 10.64% | 11.19% | 11.22% | 11.65% |
| 2                           | 3.2%   | 3.4%   | 3.6%   | 3.6%   | 3.6%   | 2                           | 11.47% | 12.09% | 12.68% | 12.82% | 13.03% |
| 3                           | 3.8%   | 3.8%   | 4.3%   | 4.3%   | 4.3%   | 3                           | 12.32% | 12.92% | 14.23% | 14.39% | 14.65% |
| 4                           | 4.8%   | 5.0%   | 5.0%   | 5.1%   | 5.1%   | 4                           | 12.77% | 12.95% | 13.62% | 14.10% | 14.50% |
| 5                           | 4.5%   | 5.3%   | 5.3%   | 5.3%   | 5.3%   | 5                           | 13.09% | 13.24% | 13.96% | 14.57% | 15.23% |
| 6                           | 5.0%   | 5.6%   | 5.9%   | 6.2%   | 6.2%   | 6                           | 13.12% | 13.23% | 14.72% | 15.14% | 16.09% |

**Analysis II: The glucose range ( $G_-^v$  and  $G_+^v$ ) where there is a cost associated with glucose velocity**

**Scenario A.2**

**63-140 mg/dL**

| $G_-^v \backslash G_+^v$ | 110    | 120    | 130    | 140    | 150    | 160    | 170    | 180    | 190    | 200    | 210    | 220    |
|--------------------------|--------|--------|--------|--------|--------|--------|--------|--------|--------|--------|--------|--------|
| 110                      | 95.15% | 95.10% | 95.14% | 95.29% | 95.37% | 95.88% | 95.79% | 95.79% | 95.79% | 95.79% | 95.79% | 95.79% |
| 120                      | NA     | 95.15% | 95.11% | 95.10% | 95.39% | 95.63% | 95.98% | 95.98% | 95.98% | 95.98% | 95.98% | 95.98% |
| 130                      | NA     | NA     | 95.15% | 95.11% | 95.26% | 95.47% | 95.80% | 95.80% | 95.80% | 95.80% | 95.80% | 95.80% |
| 140                      | NA     | NA     | NA     | 95.15% | 94.80% | 95.19% | 95.23% | 95.23% | 95.23% | 95.23% | 95.23% | 95.23% |

**< 63 mg/dL**

| $G_-^v \backslash G_+^v$ | 110   | 120   | 130   | 140   | 150   | 160   | 170   | 180   | 190   | 200   | 210   | 220   |
|--------------------------|-------|-------|-------|-------|-------|-------|-------|-------|-------|-------|-------|-------|
| 110                      | 0.06% | 0.04% | 0.07% | 0.24% | 0.22% | 0.22% | 0.22% | 0.22% | 0.22% | 0.22% | 0.22% | 0.22% |
| 120                      | NA    | 0.06% | 0.00% | 0.11% | 0.19% | 0.19% | 0.19% | 0.19% | 0.19% | 0.19% | 0.19% | 0.19% |
| 130                      | NA    | NA    | 0.06% | 0.03% | 0.20% | 0.20% | 0.20% | 0.20% | 0.20% | 0.20% | 0.20% | 0.20% |
| 140                      | NA    | NA    | NA    | 0.06% | 0.15% | 0.26% | 0.26% | 0.26% | 0.26% | 0.26% | 0.26% | 0.26% |

**> 140 mg/dL**

| $G_-^v \backslash G_+^v$ | 110   | 120   | 130   | 140   | 150   | 160   | 170   | 180   | 190   | 200   | 210   | 220   |
|--------------------------|-------|-------|-------|-------|-------|-------|-------|-------|-------|-------|-------|-------|
| 110                      | 4.80% | 4.86% | 4.80% | 4.47% | 4.41% | 3.90% | 3.99% | 3.99% | 3.99% | 3.99% | 3.99% | 3.99% |
| 120                      | NA    | 4.80% | 4.89% | 4.79% | 4.42% | 4.18% | 3.83% | 3.83% | 3.83% | 3.83% | 3.83% | 3.83% |
| 130                      | NA    | NA    | 4.80% | 4.86% | 4.54% | 4.33% | 4.00% | 4.00% | 4.00% | 4.00% | 4.00% | 4.00% |
| 140                      | NA    | NA    | NA    | 4.80% | 5.05% | 4.55% | 4.52% | 4.52% | 4.52% | 4.52% | 4.52% | 4.52% |

Scenario B.1.a

63-140 mg/dL

| $G_-^v \backslash G_+^v$ | 110    | 120    | 130    | 140    | 150    | 160    | 170    | 180    | 190    | 200    | 210    | 220    |
|--------------------------|--------|--------|--------|--------|--------|--------|--------|--------|--------|--------|--------|--------|
| 110                      | 95.15% | 95.10% | 95.14% | 95.29% | 95.37% | 95.88% | 95.79% | 95.79% | 95.79% | 95.79% | 95.79% | 95.79% |
| 120                      | NA     | 95.15% | 95.11% | 95.10% | 95.39% | 95.63% | 95.98% | 95.98% | 95.98% | 95.98% | 95.98% | 95.98% |
| 130                      | NA     | NA     | 95.15% | 95.11% | 95.26% | 95.47% | 95.80% | 95.80% | 95.80% | 95.80% | 95.80% | 95.80% |
| 140                      | NA     | NA     | NA     | 95.15% | 94.80% | 95.19% | 95.23% | 95.23% | 95.23% | 95.23% | 95.23% | 95.23% |

< 63 mg/dL

| $G_-^v \backslash G_+^v$ | 110   | 120   | 130   | 140   | 150   | 160   | 170   | 180   | 190   | 200   | 210   | 220   |
|--------------------------|-------|-------|-------|-------|-------|-------|-------|-------|-------|-------|-------|-------|
| 110                      | 0.06% | 0.04% | 0.07% | 0.24% | 0.22% | 0.22% | 0.22% | 0.22% | 0.22% | 0.22% | 0.22% | 0.22% |
| 120                      | NA    | 0.06% | 0.00% | 0.11% | 0.19% | 0.19% | 0.19% | 0.19% | 0.19% | 0.19% | 0.19% | 0.19% |
| 130                      | NA    | NA    | 0.06% | 0.03% | 0.20% | 0.20% | 0.20% | 0.20% | 0.20% | 0.20% | 0.20% | 0.20% |
| 140                      | NA    | NA    | NA    | 0.06% | 0.15% | 0.26% | 0.26% | 0.26% | 0.26% | 0.26% | 0.26% | 0.26% |

> 140 mg/dL

| $G_-^v \backslash G_+^v$ | 110   | 120   | 130   | 140   | 150   | 160   | 170   | 180   | 190   | 200   | 210   | 220   |
|--------------------------|-------|-------|-------|-------|-------|-------|-------|-------|-------|-------|-------|-------|
| 110                      | 4.80% | 4.86% | 4.80% | 4.47% | 4.41% | 3.90% | 3.99% | 3.99% | 3.99% | 3.99% | 3.99% | 3.99% |
| 120                      | NA    | 4.80% | 4.89% | 4.79% | 4.42% | 4.18% | 3.83% | 3.83% | 3.83% | 3.83% | 3.83% | 3.83% |
| 130                      | NA    | NA    | 4.80% | 4.86% | 4.54% | 4.33% | 4.00% | 4.00% | 4.00% | 4.00% | 4.00% | 4.00% |
| 140                      | NA    | NA    | NA    | 4.80% | 5.05% | 4.55% | 4.52% | 4.52% | 4.52% | 4.52% | 4.52% | 4.52% |

Note: Results for  $G_+^v \geq 170$  mg/dL are the same across columns because the controller manages to keep glucose below 180 mg/dL throughout.

**Analysis III: Reference glucose ( $G_{ref}$ ) and bolus reduction threshold ( $G^m$ )**

| Scenario A.2             |           |           |           |           |            |            | Scenario B.1.a           |           |           |           |           |            |            |
|--------------------------|-----------|-----------|-----------|-----------|------------|------------|--------------------------|-----------|-----------|-----------|-----------|------------|------------|
| <b>63-140 mg/dL</b>      |           |           |           |           |            |            | <b>63-140 mg/dL</b>      |           |           |           |           |            |            |
| $G_{ref} \backslash G^m$ | <b>60</b> | <b>70</b> | <b>80</b> | <b>90</b> | <b>100</b> | <b>110</b> | $G_{ref} \backslash G^m$ | <b>60</b> | <b>70</b> | <b>80</b> | <b>90</b> | <b>100</b> | <b>110</b> |
| <b>70</b>                | 96.64%    | 96.30%    | 96.30%    | 94.98%    | 94.17%     | 94.28%     | <b>70</b>                | 88.58%    | 88.58%    | 88.47%    | 87.70%    | 86.59%     | 85.70%     |
| <b>80</b>                | 96.18%    | 96.07%    | 96.18%    | 94.95%    | 94.00%     | 93.60%     | <b>80</b>                | 87.55%    | 87.55%    | 87.34%    | 86.93%    | 85.37%     | 84.77%     |
| <b>90</b>                | 96.25%    | 95.98%    | 95.98%    | 94.46%    | 93.70%     | 93.99%     | <b>90</b>                | 87.08%    | 87.08%    | 87.00%    | 86.71%    | 85.18%     | 83.84%     |
| <b>100</b>               | 95.68%    | 95.42%    | 95.63%    | 94.54%    | 93.25%     | 92.59%     | <b>100</b>               | 86.41%    | 86.41%    | 86.23%    | 86.36%    | 84.61%     | 83.27%     |
| <b>110</b>               | 95.33%    | 94.96%    | 94.80%    | 93.70%    | 92.02%     | 91.97%     | <b>110</b>               | 86.04%    | 86.04%    | 85.93%    | 85.52%    | 84.31%     | 82.59%     |
| <b>&lt; 63 mg/dL</b>     |           |           |           |           |            |            | <b>&lt; 63 mg/dL</b>     |           |           |           |           |            |            |
| $G_{ref} \backslash G^m$ | <b>60</b> | <b>70</b> | <b>80</b> | <b>90</b> | <b>100</b> | <b>110</b> | $G_{ref} \backslash G^m$ | <b>60</b> | <b>70</b> | <b>80</b> | <b>90</b> | <b>100</b> | <b>110</b> |
| <b>70</b>                | 0.00%     | 0.10%     | 0.10%     | 0.08%     | 0.08%      | 0.08%      | <b>70</b>                | 0.03%     | 0.03%     | 0.03%     | 0.00%     | 0.00%      | 0.00%      |
| <b>80</b>                | 0.35%     | 0.24%     | 0.13%     | 0.08%     | 0.12%      | 0.12%      | <b>80</b>                | 0.00%     | 0.00%     | 0.00%     | 0.00%     | 0.00%      | 0.00%      |
| <b>90</b>                | 0.19%     | 0.19%     | 0.19%     | 0.03%     | 0.07%      | 0.07%      | <b>90</b>                | 0.00%     | 0.00%     | 0.00%     | 0.00%     | 0.00%      | 0.00%      |
| <b>100</b>               | 0.37%     | 0.37%     | 0.16%     | 0.02%     | 0.01%      | 0.01%      | <b>100</b>               | 0.00%     | 0.00%     | 0.00%     | 0.00%     | 0.00%      | 0.00%      |
| <b>110</b>               | 0.03%     | 0.03%     | 0.03%     | 0.03%     | 0.00%      | 0.00%      | <b>110</b>               | 0.00%     | 0.00%     | 0.00%     | 0.00%     | 0.00%      | 0.00%      |
| <b>&gt; 140 mg/dL</b>    |           |           |           |           |            |            | <b>&gt; 140 mg/dL</b>    |           |           |           |           |            |            |
| $G_{ref} \backslash G^m$ | <b>60</b> | <b>70</b> | <b>80</b> | <b>90</b> | <b>100</b> | <b>110</b> | $G_{ref} \backslash G^m$ | <b>60</b> | <b>70</b> | <b>80</b> | <b>90</b> | <b>100</b> | <b>110</b> |
| <b>70</b>                | 3.36%     | 3.60%     | 3.60%     | 4.95%     | 5.75%      | 5.63%      | <b>70</b>                | 11.38%    | 11.38%    | 11.49%    | 12.30%    | 13.41%     | 14.30%     |
| <b>80</b>                | 3.46%     | 3.69%     | 3.69%     | 4.97%     | 5.88%      | 6.27%      | <b>80</b>                | 12.45%    | 12.45%    | 12.66%    | 13.07%    | 14.63%     | 15.23%     |
| <b>90</b>                | 3.57%     | 3.83%     | 3.83%     | 5.51%     | 6.23%      | 5.94%      | <b>90</b>                | 12.92%    | 12.92%    | 13.00%    | 13.29%    | 14.82%     | 16.16%     |
| <b>100</b>               | 3.96%     | 4.21%     | 4.21%     | 5.44%     | 6.75%      | 7.40%      | <b>100</b>               | 13.59%    | 13.59%    | 13.77%    | 13.64%    | 15.39%     | 16.73%     |
| <b>110</b>               | 4.64%     | 5.01%     | 5.17%     | 6.27%     | 7.98%      | 8.03%      | <b>110</b>               | 13.96%    | 13.96%    | 14.07%    | 14.48%    | 15.69%     | 17.41%     |

The value selected for  $\psi_p$

Poorest performance

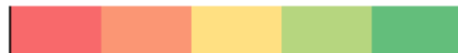

Highest performance\*

\*Color codes are applied separately for each glycemic metric and are meant to help the evaluation of performances across parameter selections within each scenario.
